# Supplementary material for: Zn and Zn-Fe Nanostructures with Multifunctional Properties as Components for Food Packaging Materials
Source: MDPI journal article supplement (doi:10.3390/nano12122104), 2022-06-18
Supplement: s1 [file s1]

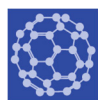

## Supplementary Material

# Zn and Zn-Fe Nanostructures with Multifunctional Properties as Components for Food Packaging Materials

Hafsae Lamsaf <sup>1,2</sup>, Lina F. Ballesteros <sup>3,4</sup>, Miguel A. Cerqueira <sup>2</sup>, José A. Teixeira <sup>3,4</sup>, Lorenzo M. Pastrana <sup>2</sup>, Luís Rebouta <sup>1</sup>, Sandra Carvalho <sup>5</sup> and Sebastian Calderon V <sup>1,2,\*</sup>

<sup>1</sup> CF-UM-UP, Centre of Physics of Minho and Porto Universities, Campus of Azurém, 4800-058 Guimarães, Portugal; hafsae.lamsaf@gmail.com (H.L.); rebouta@fisica.uminho.pt (L.R.)

<sup>2</sup> INL—International Iberian Nanotechnology Laboratory, Av. Mestre José Veiga s/n, 4715-330 Braga, Portugal; miguel.cerqueira@inl.int (M.A.C.); lorenzo.pastrana@inl.int (L.M.P.)

<sup>3</sup> CEB—Centre of Biological Engineering, University of Minho, Campus of Gualtar, 4710-057 Braga, Portugal; linafernanda37@ceb.uminho.pt (L.F.B.); jateixeira@deb.uminho.pt (J.A.T.)

<sup>4</sup> LABBELS—Associate Laboratory, Braga/Guimarães, Portugal

<sup>5</sup> CEMMPRE, Mechanical Engineering Department, University of Coimbra, 3030-788 Coimbra, Portugal; sandra.carvalho@dem.uc.pt

\* Correspondence: secave44@gmail.com

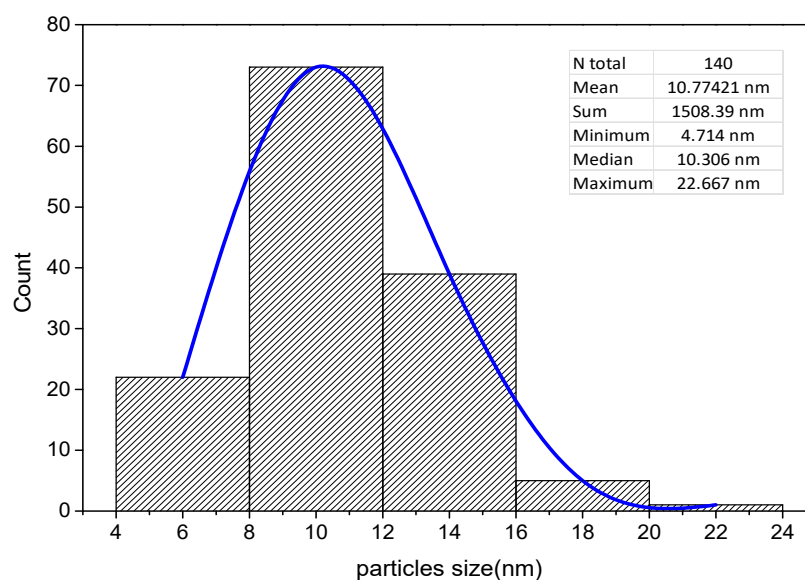

**Figure S1.** Size distribution of Fe particles in Zn NLs+Fe NPs sample.

The ratio of Zn/Fe samples obtained by ICP and EDS for each sample is presented in Table S1. The Zn/Fe values are quite similar for Zn-Fe alloy and Zn-Fe NLs coatings, and it is expected to be higher for Zn NLs + Fe NPs since the coating is deposited on a centered line of 3 mm surrounded by only Zn NPs (see the real image of the Zn NLs + Fe NPs sample in Figure S2).

**Table S1.** Values of Zn/Fe ratios obtained by ICP and EDS.

| Coating       | Zn/Fe ratio |       |
|---------------|-------------|-------|
|               | ICP-OES     | EDS   |
| ZnFe alloy    | 2.5         | 1.91  |
| ZnNLs + FeNPs | 34.14       | 10.12 |
| ZnFe NLs      | 18.34       | 12.71 |

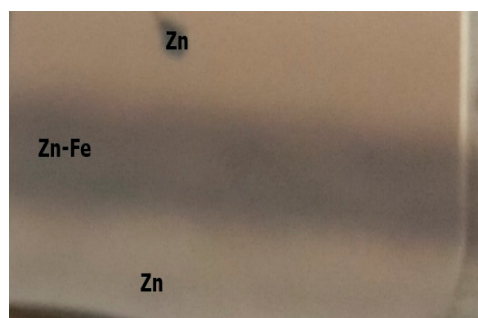

**Figure S2.** Real image of Zn NLs + Fe NPs coating.
